# Supplementary material for: Controlling the strength of interaction between carbon dioxide and nitrogen-rich carbon materials by molecular design
Source: Royal Society of Chemistry journal article supplement (doi:10.1039/c9se00486f), 2019-01-01
Supplement: c9se00486f1.pdf [file c9se00486f1.pdf]

# Controlling the Strength of Interaction between Carbon Dioxide and Nitrogen-Rich Carbon Materials by Molecular Design

**Ralf Walczak,<sup>a</sup> Aleksandr Savateev,<sup>a</sup> Julian Heske,<sup>b</sup>  
Nadezda V. Tarakina,<sup>a</sup> Sudhir Sahoo,<sup>b</sup> Jan D. Epping,<sup>b</sup>  
Thomas D. Kühne,<sup>b</sup> Bogdan Kurpil,<sup>a</sup> Markus Antonietti,<sup>a</sup>  
Martin Oschatz<sup>\*,a,d</sup>**

<sup>a</sup> *Max Planck Institute of Colloids and Interfaces, Colloid Chemistry, Research Campus Golm, Am Mühlenberg 1, 14476 Potsdam, Germany. E-mail: martin.oschatz@mpikg.mpg.de*

<sup>b</sup> *Chair of Theoretical Chemistry and Center for Sustainable Systems Design, University of Paderborn, Warburger Str. 100, D-33098 Paderborn, Germany.*

<sup>c</sup> *Fakultät II: Mathematik & Naturwissenschaften, Institut für Chemie, Technische Universität Berlin, Hardenbergstr. 40, 10623 Berlin, Germany.*

<sup>d</sup> *Institute of Chemistry, University of Potsdam, Karl-Liebknecht-Str. 24-25, D-14476 Potsdam, Germany.*

**Electronic Supplementary Information (ESI†)**

# Supplementary Figures

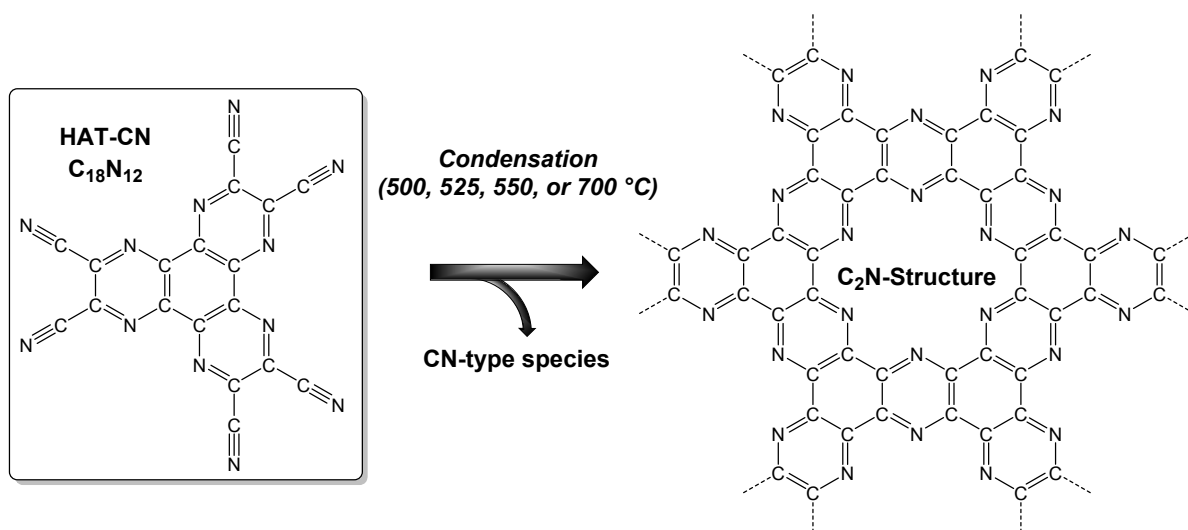

**Figure S1.** Thermal condensation of HAT-CN to C<sub>2</sub>N-type products.

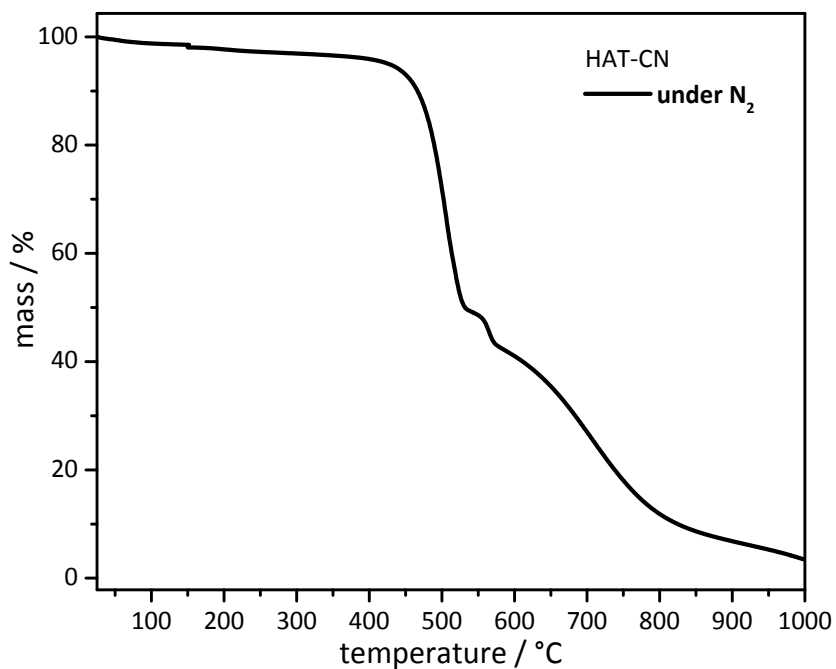

**Figure S2.** Thermal analysis of HAT-CN under nitrogen with a heating rate of 5 °C min<sup>-1</sup>.

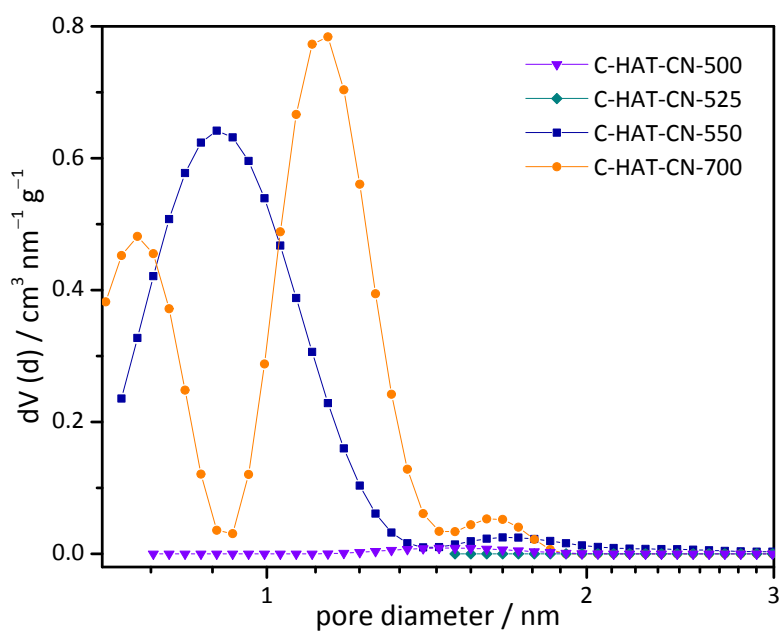

**Figure S3.** Differential pore size distribution plot calculated with QSDFT (Ar on carbons with cylindrical/sphere pores at -186 °C, adsorption branch kernel) of C-HAT-CN-500, of C-HAT-CN-525, of C-HAT-CN-550, and C-HAT-CN-700.

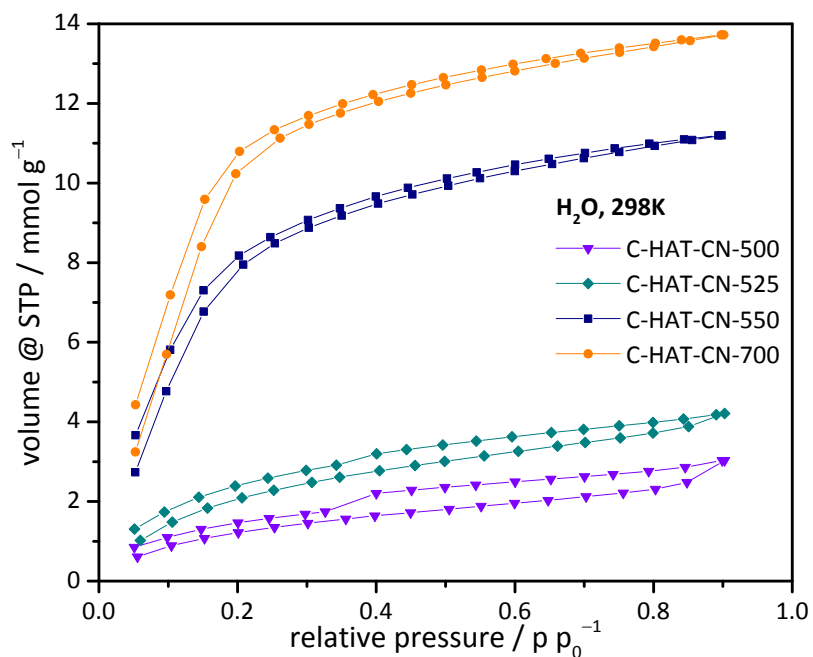

**Figure S4.** H<sub>2</sub>O vapor physisorption isotherms (at 25 °C) of C-HAT-CN-500, C-HAT-CN-525, C-HAT-CN-550, and C-HAT-CN-700.

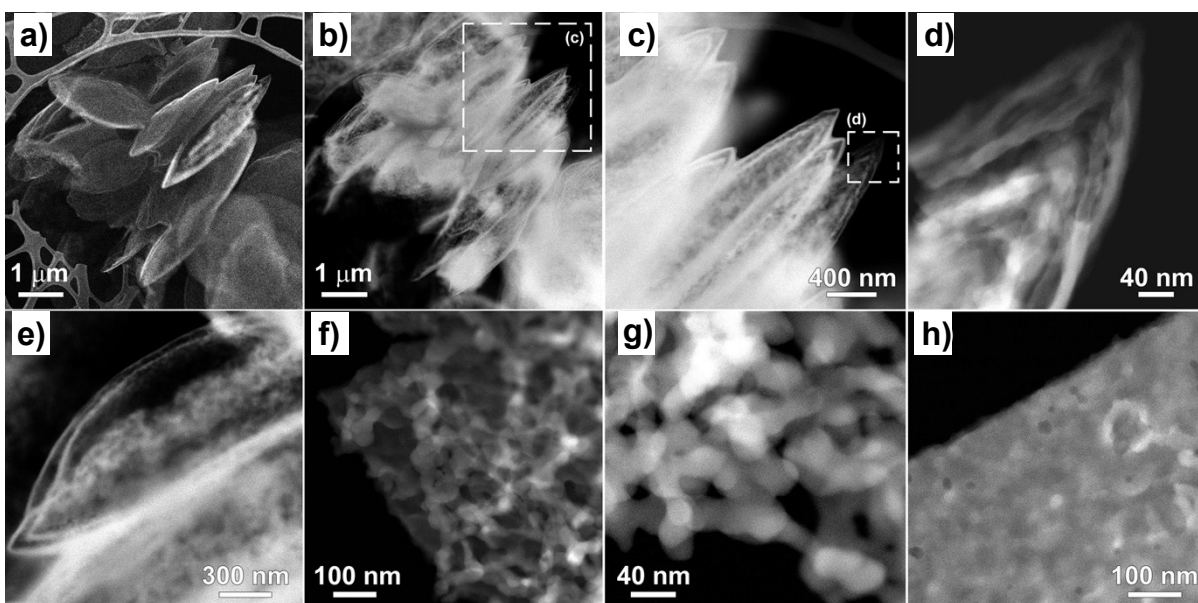

**Figure S5.** Backscattered electron image (a) and ADF-STEM images (b-h) of HAT-525. (b) shows the same areas as in (a), dotted lines in (b) and (c) indicate areas enlarged in (c) and (d), respectively. Images (f) and (g) show the inner morphology of the particles. (h) shows the morphology of the outer layer of the particles.

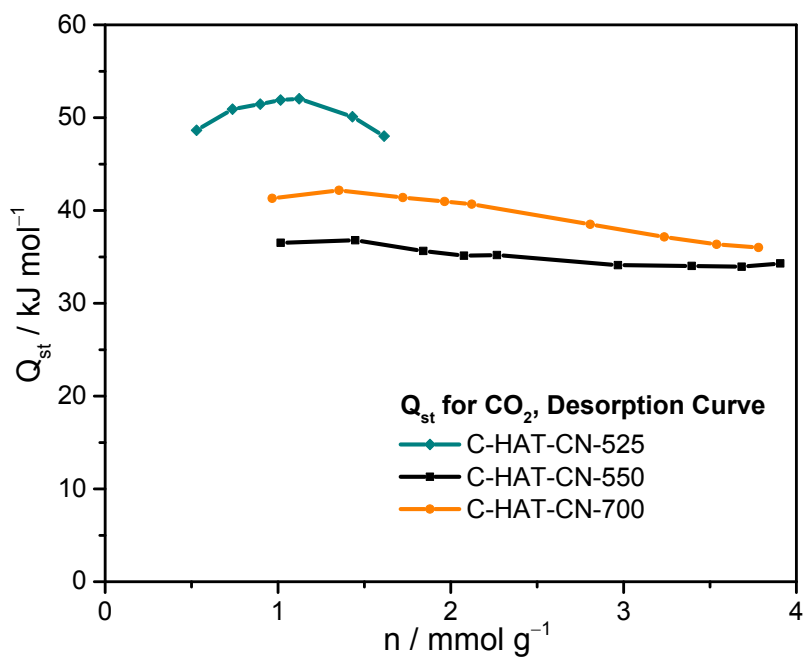

**Figure S6.** Isothermic heat ( $Q_{st}$ ) of  $CO_2$  adsorption of C-HAT-CN-525, C-HAT-CN-550, and C-HAT-CN-700.

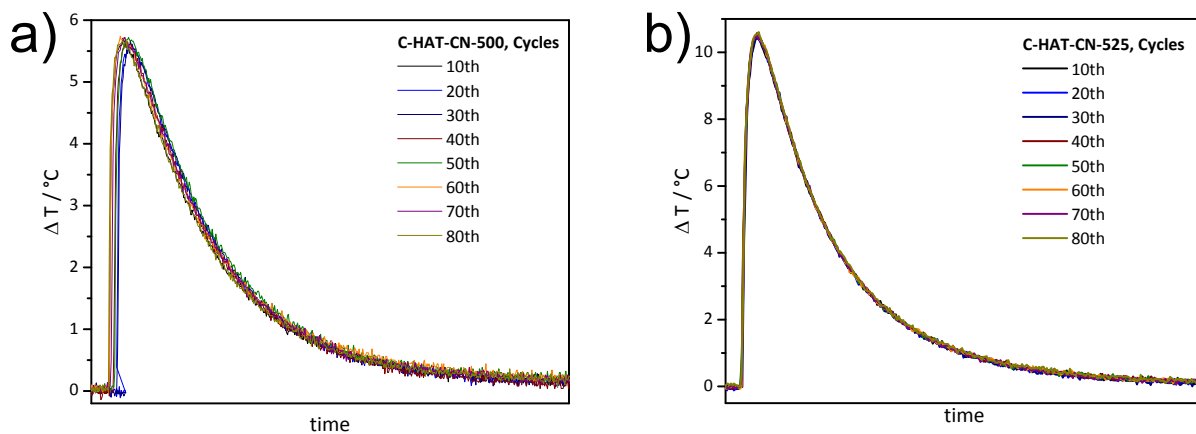

**Figure S7.** Thermal response curves during cycling experiments on C-HAT-CN-500 (a) and C-HAT-CN-525 (b) using  $\text{CO}_2$  as test gas at 1 bar at 25  $^\circ\text{C}$  over 80 adsorption/desorption cycles.

# Experimental and Computational Details

## *Electron Microscopy Investigations*

For high-resolution transmission electron microscopy HRTEM and scanning transmission electron microscopy (STEM) observations, a suspension of the sample in ethanol was sonicated for 10 minutes and then drop-casted to the Cu grid with a lacey carbon support and dried for 5 minutes. The STEM study was performed using a double Cs corrected JEOL JEM-ARM200F (S)TEM operated at 80kV and equipped with a cold-field emission gun, a high-angle silicon drift Energy Dispersive X-ray (EDX) detector (solid angle up to 0.98 steradians with a detection area of 100 mm<sup>2</sup>) and a Gatan Quantum GIF spectroscopy system. Annular Dark Field Scanning Transmission Electron Microscopy (ADF - STEM) images were collected at a probe convergence semi-angle of 24 mrad. HRTEM was performed at the same instrument operating at 200 kV

## *Computational Details*

Periodic density functional theory calculations were carried out using the hybrid Gaussian and plane wave approach,<sup>[1]</sup> as implemented in the CP2K/Quickstep code.<sup>[2]</sup> The Kohn-Sham orbitals were described by an accurate molecularly optimized double-zeta basis set with one additional set of polarization function, while the charge density was represented by plane waves with a density cutoff of 500 Ry.<sup>[3]</sup> Separable norm-conserving pseudopotentials were used to mimic the interactions between the valence electrons and the ionic cores.<sup>[4]</sup> The B97-D exchange and correlation functional, which is based on Becke's power-series *Ansatz*, plus a damped atom-pairwise dispersion correction to account for long-range van der Waals interactions was employed.<sup>[5]</sup> The C<sub>2</sub>N structure was modeled using a supercell with a=b=16.8, c=12.3 Å and  $\alpha=\beta=90.0$  and  $\gamma=16.0$ , which consists of 4 C<sub>2</sub>N-layers. Optimized structures were obtained by globally minimizing the potential energy, while varying the atomic positions by dynamical simulated annealing<sup>[6]</sup> based on the second-generation Car-Parrinello approach of Kühne *et al.*<sup>[7]</sup>

## *Atomic coordinates CO<sub>2</sub> in C<sub>2</sub>N*

|   |          |          |          |
|---|----------|----------|----------|
| C | 7.656810 | 6.102780 | 0.000000 |
| C | 7.656810 | 6.102780 | 3.300000 |

|   |           |           |          |
|---|-----------|-----------|----------|
| C | 7.656810  | 6.102780  | 6.600000 |
| C | 7.656810  | 6.102780  | 9.900000 |
| C | 11.852940 | 13.381050 | 0.000000 |
| C | 11.852940 | 13.381050 | 3.300000 |
| C | 11.852940 | 13.381050 | 6.600000 |
| C | 11.852940 | 13.381050 | 9.900000 |
| C | 16.054180 | 6.099530  | 0.000000 |
| C | 16.054180 | 6.099530  | 3.300000 |
| C | 16.054180 | 6.099530  | 6.600000 |
| C | 16.054180 | 6.099530  | 9.900000 |
| C | 20.258350 | 13.383060 | 0.000000 |
| C | 20.258360 | 13.383070 | 3.300000 |
| C | 20.258350 | 13.383060 | 6.600000 |
| C | 20.258360 | 13.383070 | 9.900000 |
| C | 7.686130  | 3.579330  | 0.000000 |
| C | 7.686130  | 3.579330  | 3.300000 |
| C | 7.686130  | 3.579330  | 6.600000 |
| C | 7.686130  | 3.579330  | 9.900000 |
| C | 11.880620 | 10.852770 | 0.000000 |
| C | 11.880620 | 10.852770 | 3.300000 |
| C | 11.880620 | 10.852770 | 6.600000 |
| C | 11.880620 | 10.852770 | 9.900000 |
| C | 16.085279 | 3.574160  | 0.000000 |
| C | 16.085279 | 3.574160  | 3.300000 |
| C | 16.085279 | 3.574160  | 6.600000 |

|   |           |           |          |
|---|-----------|-----------|----------|
| C | 16.085279 | 3.574160  | 9.900000 |
| C | 20.290470 | 10.853490 | 0.000000 |
| C | 20.290470 | 10.853500 | 3.300000 |
| C | 20.290470 | 10.853490 | 6.600000 |
| C | 20.290470 | 10.853500 | 9.900000 |
| C | 9.143310  | 6.102960  | 0.000000 |
| C | 9.143310  | 6.102960  | 3.300000 |
| C | 9.143310  | 6.102960  | 6.600000 |
| C | 9.143310  | 6.102960  | 9.900000 |
| C | 13.341710 | 13.382940 | 0.000000 |
| C | 13.341710 | 13.382940 | 3.300000 |
| C | 13.341710 | 13.382940 | 6.600000 |
| C | 13.341710 | 13.382940 | 9.900000 |
| C | 17.545759 | 6.099740  | 0.000000 |
| C | 17.545759 | 6.099740  | 3.300000 |
| C | 17.545759 | 6.099740  | 6.600000 |
| C | 17.545759 | 6.099740  | 9.900000 |
| C | 21.747110 | 13.381060 | 0.000000 |
| C | 21.747110 | 13.381060 | 3.300000 |
| C | 21.747110 | 13.381060 | 6.600000 |
| C | 21.747110 | 13.381060 | 9.900000 |
| C | 6.939080  | -0.013080 | 0.000000 |
| C | 6.939080  | -0.013080 | 3.300000 |
| C | 6.939080  | -0.013080 | 6.600000 |
| C | 6.939080  | -0.013080 | 9.900000 |



|   |           |           |          |
|---|-----------|-----------|----------|
| C | 11.138050 | 7.255910  | 0.000000 |
| C | 11.138050 | 7.255910  | 3.300000 |
| C | 11.138050 | 7.255910  | 6.600000 |
| C | 11.138050 | 7.255910  | 9.900000 |
| C | 15.342950 | -0.017140 | 0.000000 |
| C | 15.342950 | -0.017140 | 3.300000 |
| C | 15.342950 | -0.017140 | 6.600000 |
| C | 15.342950 | -0.017140 | 9.900000 |
| C | 19.544519 | 7.253750  | 0.000000 |
| C | 19.544519 | 7.253750  | 3.300000 |
| C | 19.544519 | 7.253750  | 6.600000 |
| C | 19.544519 | 7.253750  | 9.900000 |
| C | 7.685170  | 1.275290  | 0.000000 |
| C | 7.685170  | 1.275290  | 3.300000 |
| C | 7.685170  | 1.275290  | 6.600000 |
| C | 7.685170  | 1.275290  | 9.900000 |
| C | 11.880700 | 8.546250  | 0.000000 |
| C | 11.880700 | 8.546250  | 3.300000 |
| C | 11.880700 | 8.546250  | 6.600000 |
| C | 11.880700 | 8.546250  | 9.900000 |
| C | 16.086380 | 1.270130  | 0.000000 |
| C | 16.086380 | 1.270130  | 3.300000 |
| C | 16.086380 | 1.270130  | 6.600000 |
| C | 16.086380 | 1.270130  | 9.900000 |
| C | 20.290520 | 8.545420  | 0.000000 |

|   |           |           |          |
|---|-----------|-----------|----------|
| C | 20.290510 | 8.545420  | 3.300000 |
| C | 20.290520 | 8.545420  | 6.600000 |
| C | 20.290510 | 8.545420  | 9.900000 |
| C | 9.113630  | 3.579490  | 0.000000 |
| C | 9.113630  | 3.579500  | 3.300000 |
| C | 9.113630  | 3.579490  | 6.600000 |
| C | 9.113630  | 3.579500  | 9.900000 |
| C | 13.309480 | 10.853510 | 0.000000 |
| C | 13.309480 | 10.853510 | 3.300000 |
| C | 13.309480 | 10.853510 | 6.600000 |
| C | 13.309480 | 10.853510 | 9.900000 |
| C | 17.514830 | 3.574340  | 0.000000 |
| C | 17.514830 | 3.574340  | 3.300000 |
| C | 17.514830 | 3.574340  | 6.600000 |
| C | 17.514830 | 3.574340  | 9.900000 |
| C | 21.719299 | 10.852620 | 0.000000 |
| C | 21.719299 | 10.852620 | 3.300000 |
| C | 21.719299 | 10.852620 | 6.600000 |
| C | 21.719299 | 10.852620 | 9.900000 |
| C | 9.857060  | 4.866760  | 0.000000 |
| C | 9.857060  | 4.866760  | 3.300000 |
| C | 9.857060  | 4.866760  | 6.600000 |
| C | 9.857060  | 4.866760  | 9.900000 |
| C | 14.055510 | 12.145130 | 0.000000 |
| C | 14.055510 | 12.145130 | 3.300000 |

|   |           |           |          |
|---|-----------|-----------|----------|
| C | 14.055510 | 12.145130 | 6.600000 |
| C | 14.055510 | 12.145130 | 9.900000 |
| C | 18.260910 | 4.862720  | 0.000000 |
| C | 18.260910 | 4.862710  | 3.300000 |
| C | 18.260910 | 4.862720  | 6.600000 |
| C | 18.260910 | 4.862710  | 9.900000 |
| C | 22.461910 | 12.142960 | 0.000000 |
| C | 22.461910 | 12.142960 | 3.300000 |
| C | 22.461910 | 12.142960 | 6.600000 |
| C | 22.461910 | 12.142960 | 9.900000 |
| C | 3.458300  | 6.015930  | 0.000000 |
| C | 3.458300  | 6.015930  | 3.300000 |
| C | 3.458300  | 6.015930  | 6.600000 |
| C | 3.458300  | 6.015930  | 9.900000 |
| C | 7.656690  | 13.295860 | 0.000000 |
| C | 7.656690  | 13.295860 | 3.300000 |
| C | 7.656690  | 13.295860 | 6.600000 |
| C | 7.656690  | 13.295860 | 9.900000 |
| C | 11.852890 | 6.017840  | 0.000000 |
| C | 11.852890 | 6.017840  | 3.300000 |
| C | 11.852890 | 6.017840  | 6.600000 |
| C | 11.852890 | 6.017840  | 9.900000 |
| C | 16.054260 | 13.299140 | 0.000000 |
| C | 16.054260 | 13.299140 | 3.300000 |
| C | 16.054260 | 13.299140 | 6.600000 |

|   |           |           |          |
|---|-----------|-----------|----------|
| C | 16.054260 | 13.299140 | 9.900000 |
| C | 1.457090  | -0.017010 | 0.000000 |
| C | 1.457090  | -0.017010 | 3.300000 |
| C | 1.457090  | -0.017010 | 6.600000 |
| C | 1.457090  | -0.017010 | 9.900000 |
| C | 5.662030  | 7.255770  | 0.000000 |
| C | 5.662030  | 7.255770  | 3.300000 |
| C | 5.662030  | 7.255770  | 6.600000 |
| C | 5.662030  | 7.255770  | 9.900000 |
| C | 9.860900  | -0.012810 | 0.000000 |
| C | 9.860900  | -0.012820 | 3.300000 |
| C | 9.860900  | -0.012810 | 6.600000 |
| C | 9.860900  | -0.012820 | 9.900000 |
| C | 14.055370 | 7.253630  | 0.000000 |
| C | 14.055360 | 7.253630  | 3.300000 |
| C | 14.055370 | 7.253630  | 6.600000 |
| C | 14.055360 | 7.253630  | 9.900000 |
| C | 4.947070  | 6.017840  | 0.000000 |
| C | 4.947070  | 6.017850  | 3.300000 |
| C | 4.947070  | 6.017840  | 6.600000 |
| C | 4.947070  | 6.017850  | 9.900000 |
| C | 9.143190  | 13.296050 | 0.000000 |
| C | 9.143190  | 13.296050 | 3.300000 |
| C | 9.143190  | 13.296050 | 6.600000 |
| C | 9.143190  | 13.296050 | 9.900000 |

|   |           |           |          |
|---|-----------|-----------|----------|
| C | 13.341640 | 6.015810  | 0.000000 |
| C | 13.341640 | 6.015810  | 3.300000 |
| C | 13.341640 | 6.015810  | 6.600000 |
| C | 13.341640 | 6.015810  | 9.900000 |
| C | 17.545799 | 13.299350 | 0.000000 |
| C | 17.545799 | 13.299350 | 3.300000 |
| C | 17.545799 | 13.299350 | 6.600000 |
| C | 17.545799 | 13.299350 | 9.900000 |
| C | 6.942900  | 4.866630  | 0.000000 |
| C | 6.942890  | 4.866630  | 3.300000 |
| C | 6.942900  | 4.866630  | 6.600000 |
| C | 6.942890  | 4.866630  | 9.900000 |
| C | 11.138010 | 12.143110 | 0.000000 |
| C | 11.138010 | 12.143110 | 3.300000 |
| C | 11.138010 | 12.143110 | 6.600000 |
| C | 11.138010 | 12.143110 | 9.900000 |
| C | 15.339100 | 4.862450  | 0.000000 |
| C | 15.339100 | 4.862450  | 3.300000 |
| C | 15.339100 | 4.862450  | 6.600000 |
| C | 15.339100 | 4.862450  | 9.900000 |
| C | 19.544600 | 12.145260 | 0.000000 |
| C | 19.544600 | 12.145260 | 3.300000 |
| C | 19.544600 | 12.145260 | 6.600000 |
| C | 19.544600 | 12.145260 | 9.900000 |
| C | 0.713860  | 1.270290  | 0.000000 |

|   |           |           |          |
|---|-----------|-----------|----------|
| C | 0.713860  | 1.270290  | 3.300000 |
| C | 0.713860  | 1.270290  | 6.600000 |
| C | 0.713860  | 1.270290  | 9.900000 |
| C | 4.919380  | 8.546090  | 0.000000 |
| C | 4.919380  | 8.546090  | 3.300000 |
| C | 4.919380  | 8.546090  | 6.600000 |
| C | 4.919380  | 8.546090  | 9.900000 |
| C | 9.114710  | 1.275470  | 0.000000 |
| C | 9.114710  | 1.275470  | 3.300000 |
| C | 9.114710  | 1.275470  | 6.600000 |
| C | 9.114710  | 1.275470  | 9.900000 |
| C | 13.309530 | 8.545430  | 0.000000 |
| C | 13.309530 | 8.545430  | 3.300000 |
| C | 13.309530 | 8.545430  | 6.600000 |
| C | 13.309530 | 8.545430  | 9.900000 |
| N | 11.192830 | 4.855230  | 0.000000 |
| N | 11.192830 | 4.855230  | 3.300000 |
| N | 11.192830 | 4.855230  | 6.600000 |
| N | 11.192830 | 4.855230  | 9.900000 |
| N | 15.391840 | 12.138350 | 0.000000 |
| N | 15.391840 | 12.138340 | 3.300000 |
| N | 15.391840 | 12.138350 | 6.600000 |
| N | 15.391840 | 12.138350 | 9.900000 |
| N | 19.598520 | 4.852210  | 0.000000 |
| N | 19.598520 | 4.852210  | 3.300000 |

|   |           |           |          |
|---|-----------|-----------|----------|
| N | 19.598520 | 4.852210  | 6.600000 |
| N | 19.598520 | 4.852210  | 9.900000 |
| N | 23.798759 | 12.133260 | 0.000000 |
| N | 23.798759 | 12.133260 | 3.300000 |
| N | 23.798759 | 12.133260 | 6.600000 |
| N | 23.798759 | 12.133260 | 9.900000 |
| N | 5.601510  | -0.002520 | 0.000000 |
| N | 5.601510  | -0.002520 | 3.300000 |
| N | 5.601510  | -0.002520 | 6.600000 |
| N | 5.601510  | -0.002520 | 9.900000 |
| N | 9.801220  | 7.265580  | 0.000000 |
| N | 9.801220  | 7.265580  | 3.300000 |
| N | 9.801220  | 7.265580  | 6.600000 |
| N | 9.801220  | 7.265580  | 9.900000 |
| N | 14.007170 | -0.005590 | 0.000000 |
| N | 14.007170 | -0.005590 | 3.300000 |
| N | 14.007170 | -0.005590 | 6.600000 |
| N | 14.007170 | -0.005590 | 9.900000 |
| N | 18.208160 | 7.260500  | 0.000000 |
| N | 18.208160 | 7.260500  | 3.300000 |
| N | 18.208160 | 7.260500  | 6.600000 |
| N | 18.208160 | 7.260500  | 9.900000 |
| N | 7.008450  | 2.428200  | 0.000000 |
| N | 7.008450  | 2.428200  | 3.300000 |
| N | 7.008450  | 2.428200  | 6.600000 |

|   |           |           |          |
|---|-----------|-----------|----------|
| N | 7.008450  | 2.428200  | 9.900000 |
| N | 11.202890 | 9.699520  | 0.000000 |
| N | 11.202890 | 9.699520  | 3.300000 |
| N | 11.202890 | 9.699520  | 6.600000 |
| N | 11.202890 | 9.699520  | 9.900000 |
| N | 15.408690 | 2.421150  | 0.000000 |
| N | 15.408690 | 2.421150  | 3.300000 |
| N | 15.408690 | 2.421150  | 6.600000 |
| N | 15.408690 | 2.421150  | 9.900000 |
| N | 19.616659 | 9.699380  | 0.000000 |
| N | 19.616659 | 9.699370  | 3.300000 |
| N | 19.616659 | 9.699380  | 6.600000 |
| N | 19.616659 | 9.699370  | 9.900000 |
| N | 2.792820  | -0.005670 | 0.000000 |
| N | 2.792830  | -0.005670 | 3.300000 |
| N | 2.792820  | -0.005670 | 6.600000 |
| N | 2.792830  | -0.005670 | 9.900000 |
| N | 6.998820  | 7.265210  | 0.000000 |
| N | 6.998820  | 7.265210  | 3.300000 |
| N | 6.998820  | 7.265210  | 6.600000 |
| N | 6.998820  | 7.265210  | 9.900000 |
| N | 11.198470 | -0.002490 | 0.000000 |
| N | 11.198470 | -0.002490 | 3.300000 |
| N | 11.198470 | -0.002490 | 6.600000 |
| N | 11.198470 | -0.002490 | 9.900000 |



|   |           |           |          |
|---|-----------|-----------|----------|
| N | 15.391670 | 7.260130  | 0.000000 |
| N | 15.391670 | 7.260130  | 3.300000 |
| N | 15.391670 | 7.260130  | 6.600000 |
| N | 15.391670 | 7.260130  | 9.900000 |
| N | 5.607170  | 4.855310  | 0.000000 |
| N | 5.607170  | 4.855310  | 3.300000 |
| N | 5.607170  | 4.855310  | 6.600000 |
| N | 5.607170  | 4.855310  | 9.900000 |
| N | 9.801190  | 12.133630 | 0.000000 |
| N | 9.801190  | 12.133630 | 3.300000 |
| N | 9.801190  | 12.133630 | 6.600000 |
| N | 9.801190  | 12.133630 | 9.900000 |
| N | 14.001500 | 4.852170  | 0.000000 |
| N | 14.001500 | 4.852170  | 3.300000 |
| N | 14.001500 | 4.852170  | 6.600000 |
| N | 14.001500 | 4.852170  | 9.900000 |
| N | 18.208330 | 12.138730 | 0.000000 |
| N | 18.208330 | 12.138730 | 3.300000 |
| N | 18.208330 | 12.138730 | 6.600000 |
| N | 18.208330 | 12.138730 | 9.900000 |
| N | 9.791330  | 2.428470  | 0.000000 |
| N | 9.791330  | 2.428460  | 3.300000 |
| N | 9.791330  | 2.428470  | 6.600000 |
| N | 9.791330  | 2.428460  | 9.900000 |
| N | 13.983340 | 9.699460  | 0.000000 |

|   |           |          |           |
|---|-----------|----------|-----------|
| N | 13.983340 | 9.699460 | 3.300000  |
| N | 13.983340 | 9.699460 | 6.600000  |
| N | 13.983340 | 9.699460 | 9.900000  |
| N | 18.191540 | 2.421420 | 0.000000  |
| N | 18.191540 | 2.421420 | 3.300000  |
| N | 18.191540 | 2.421420 | 6.600000  |
| N | 18.191540 | 2.421420 | 9.900000  |
| N | 22.397110 | 9.699450 | 0.000000  |
| N | 22.397120 | 9.699450 | 3.300000  |
| N | 22.397120 | 9.699450 | 6.600000  |
| N | 22.397120 | 9.699450 | 9.900000  |
| C | 16.799906 | 9.699467 | 6.668839  |
| O | 16.799974 | 9.699486 | 7.837833  |
| O | 16.799999 | 9.699481 | 5.501488  |
| C | 16.799908 | 9.699467 | 0.068839  |
| O | 16.799976 | 9.699486 | 1.237832  |
| O | 16.799999 | 9.699481 | -1.098512 |
| C | 8.399993  | 9.699480 | 6.600013  |
| O | 8.436068  | 9.699453 | 7.767787  |
| O | 8.363932  | 9.699527 | 5.432231  |
| C | 8.399993  | 9.699479 | 0.000034  |
| O | 8.436074  | 9.699453 | 1.167809  |
| O | 8.363925  | 9.699527 | -1.167746 |
| C | 12.616377 | 2.453383 | 9.968726  |
| O | 12.618105 | 2.456320 | 11.137695 |

|   |           |          |           |
|---|-----------|----------|-----------|
| O | 12.618034 | 2.456198 | 8.801399  |
| C | 12.616377 | 2.453383 | 3.368726  |
| O | 12.618105 | 2.456320 | 4.537695  |
| O | 12.618034 | 2.456198 | 2.201400  |
| C | 4.249375  | 2.453409 | 9.968646  |
| O | 4.254428  | 2.456282 | 11.137601 |
| O | 4.254220  | 2.456157 | 8.801332  |
| C | 4.249375  | 2.453409 | 3.368646  |
| O | 4.254428  | 2.456282 | 4.537601  |
| O | 4.254220  | 2.456157 | 2.201333  |

*Atomic coordinates CO<sub>2</sub> in C<sub>3</sub>H*

|   |           |           |          |
|---|-----------|-----------|----------|
| C | 7.685840  | 6.068870  | 9.900010 |
| C | 11.885950 | 13.343670 | 9.900130 |
| C | 16.085899 | 6.068990  | 9.900110 |
| C | 20.285879 | 13.343590 | 9.900160 |
| C | 7.701030  | 3.621620  | 9.899970 |
| C | 11.901100 | 10.896260 | 9.900000 |
| C | 16.101101 | 3.621650  | 9.900000 |
| C | 20.301050 | 10.896240 | 9.900060 |
| C | 9.114010  | 6.068970  | 9.900010 |
| C | 13.314110 | 13.343640 | 9.900210 |
| C | 17.514040 | 6.069070  | 9.900050 |
| C | 21.714081 | 13.343720 | 9.900260 |
| C | 6.987030  | -0.008880 | 9.900180 |
| C | 11.186960 | 7.265800  | 9.900000 |

|   |           |           |          |
|---|-----------|-----------|----------|
| C | 15.387120 | -0.008830 | 9.900380 |
| C | 19.587021 | 7.265820  | 9.900140 |
| C | 7.700950  | 1.228010  | 9.900050 |
| C | 11.901060 | 8.502650  | 9.900000 |
| C | 16.101160 | 1.228020  | 9.900230 |
| C | 20.301041 | 8.502630  | 9.900150 |
| C | 9.098780  | 3.621610  | 9.900040 |
| C | 13.298900 | 10.896230 | 9.899930 |
| C | 17.498989 | 3.621620  | 9.899600 |
| C | 21.698879 | 10.896210 | 9.899520 |
| C | 9.812930  | 4.858420  | 9.900030 |
| C | 14.013030 | 12.133000 | 9.899950 |
| C | 18.213020 | 4.858480  | 9.899600 |
| C | 22.413090 | 12.133020 | 9.899530 |
| C | 3.485860  | 6.055320  | 9.899770 |
| C | 7.685950  | 13.329990 | 9.899720 |
| C | 11.885880 | 6.055230  | 9.899990 |
| C | 16.085930 | 13.329890 | 9.899970 |
| C | 1.413050  | -0.008760 | 9.899870 |
| C | 5.612990  | 7.265800  | 9.899900 |
| C | 9.813000  | -0.008810 | 9.899920 |
| C | 14.013030 | 7.265840  | 9.900000 |
| C | 4.914000  | 6.055120  | 9.899900 |
| C | 9.114120  | 13.329920 | 9.899820 |
| C | 13.314070 | 6.055210  | 9.900000 |

|   |           |           |          |
|---|-----------|-----------|----------|
| C | 17.514059 | 13.329810 | 9.899960 |
| C | 6.986980  | 4.858420  | 9.900000 |
| C | 11.187040 | 12.133090 | 9.900050 |
| C | 15.387040 | 4.858480  | 9.900090 |
| C | 19.587000 | 12.133050 | 9.900150 |
| C | 0.698950  | 1.228040  | 9.899780 |
| C | 4.898880  | 8.502630  | 9.899780 |
| C | 9.098880  | 1.228020  | 9.899990 |
| C | 13.298930 | 8.502650  | 9.899990 |
| C | 11.184560 | 4.876130  | 9.900000 |
| C | 15.384680 | 12.150740 | 9.899980 |
| C | 19.584629 | 4.876210  | 9.899180 |
| C | 23.784740 | 12.150850 | 9.899180 |
| C | 5.615270  | -0.026600 | 9.900610 |
| C | 9.815160  | 7.247990  | 9.899980 |
| C | 14.015340 | -0.026520 | 9.900910 |
| C | 18.215219 | 7.248100  | 9.900110 |
| C | 7.030490  | 2.424830  | 9.899850 |
| C | 11.230590 | 9.699440  | 9.900000 |
| C | 15.430650 | 2.424780  | 9.899970 |
| C | 19.630510 | 9.699410  | 9.900140 |
| C | 2.784680  | -0.026470 | 9.900160 |
| C | 6.984640  | 7.247980  | 9.900180 |
| C | 11.184640 | -0.026550 | 9.899830 |
| C | 15.384690 | 7.248120  | 9.900060 |

|   |           |           |          |
|---|-----------|-----------|----------|
| C | 5.615230  | 4.876110  | 9.900210 |
| C | 9.815270  | 12.150900 | 9.900110 |
| C | 14.015270 | 4.876210  | 9.900060 |
| C | 18.215219 | 12.150760 | 9.900010 |
| C | 9.769300  | 2.424840  | 9.900030 |
| C | 13.969430 | 9.699430  | 9.899950 |
| C | 18.169460 | 2.424790  | 9.899120 |
| C | 22.369360 | 9.699410  | 9.899170 |
| C | 7.685860  | 6.068940  | 6.600000 |
| C | 11.885980 | 13.343740 | 6.600010 |
| C | 16.085930 | 6.069060  | 6.600010 |
| C | 20.285910 | 13.343660 | 6.600020 |
| C | 7.701030  | 3.621600  | 6.599990 |
| C | 11.901100 | 10.896240 | 6.600000 |
| C | 16.101110 | 3.621630  | 6.600000 |
| C | 20.301060 | 10.896220 | 6.600000 |
| C | 9.114030  | 6.068880  | 6.600000 |
| C | 13.314120 | 13.343540 | 6.600020 |
| C | 17.514050 | 6.068980  | 6.600000 |
| C | 21.714100 | 13.343630 | 6.600030 |
| C | 6.986960  | -0.008840 | 6.600020 |
| C | 11.186890 | 7.265840  | 6.600000 |
| C | 15.387050 | -0.008780 | 6.600040 |
| C | 19.586950 | 7.265860  | 6.600010 |
| C | 7.700990  | 1.228020  | 6.600000 |

|   |           |           |          |
|---|-----------|-----------|----------|
| C | 11.901100 | 8.502650  | 6.600000 |
| C | 16.101200 | 1.228030  | 6.600020 |
| C | 20.301081 | 8.502640  | 6.600010 |
| C | 9.098820  | 3.621620  | 6.600000 |
| C | 13.298940 | 10.896240 | 6.599990 |
| C | 17.499029 | 3.621630  | 6.599950 |
| C | 21.698931 | 10.896220 | 6.599950 |
| C | 9.812860  | 4.858470  | 6.600000 |
| C | 14.012960 | 12.133050 | 6.600000 |
| C | 18.212950 | 4.858520  | 6.599960 |
| C | 22.413019 | 12.133070 | 6.599950 |
| C | 3.485880  | 6.055230  | 6.599970 |
| C | 7.685970  | 13.329900 | 6.599970 |
| C | 11.885900 | 6.055150  | 6.600000 |
| C | 16.085951 | 13.329800 | 6.600000 |
| C | 1.412990  | -0.008780 | 6.599990 |
| C | 5.612940  | 7.265770  | 6.600000 |
| C | 9.812940  | -0.008830 | 6.599990 |
| C | 14.012980 | 7.265820  | 6.600000 |
| C | 4.914030  | 6.055190  | 6.600000 |
| C | 9.114140  | 13.329990 | 6.599990 |
| C | 13.314100 | 6.055280  | 6.600000 |
| C | 17.514080 | 13.329880 | 6.599990 |
| C | 6.986930  | 4.858390  | 6.600000 |
| C | 11.186990 | 12.133070 | 6.600010 |

|   |           |           |          |
|---|-----------|-----------|----------|
| C | 15.386990 | 4.858450  | 6.600010 |
| C | 19.586950 | 12.133030 | 6.600020 |
| C | 0.698950  | 1.228020  | 6.599970 |
| C | 4.898880  | 8.502600  | 6.599970 |
| C | 9.098880  | 1.227990  | 6.600000 |
| C | 13.298930 | 8.502630  | 6.600000 |
| C | 11.184630 | 4.876160  | 6.600000 |
| C | 15.384760 | 12.150770 | 6.599990 |
| C | 19.584709 | 4.876240  | 6.599940 |
| C | 23.784821 | 12.150880 | 6.599930 |
| C | 5.615350  | -0.026570 | 6.600040 |
| C | 9.815240  | 7.248020  | 6.600000 |
| C | 14.015420 | -0.026490 | 6.600070 |
| C | 18.215300 | 7.248130  | 6.600020 |
| C | 7.030520  | 2.424850  | 6.599990 |
| C | 11.230620 | 9.699450  | 6.600000 |
| C | 15.430680 | 2.424800  | 6.600010 |
| C | 19.630550 | 9.699430  | 6.600020 |
| C | 2.784750  | -0.026480 | 6.600010 |
| C | 6.984710  | 7.247960  | 6.600010 |
| C | 11.184710 | -0.026570 | 6.599990 |
| C | 15.384760 | 7.248110  | 6.600010 |
| C | 5.615300  | 4.876100  | 6.600010 |
| C | 9.815340  | 12.150880 | 6.600000 |
| C | 14.015340 | 4.876200  | 6.600010 |



|   |           |           |          |
|---|-----------|-----------|----------|
| C | 18.215290 | 12.150750 | 6.600000 |
| C | 9.769330  | 2.424860  | 6.600000 |
| C | 13.969460 | 9.699450  | 6.599990 |
| C | 18.169491 | 2.424810  | 6.599940 |
| C | 22.369390 | 9.699430  | 6.599940 |
| C | 7.685840  | 6.068870  | 3.300000 |
| C | 11.885950 | 13.343670 | 3.300000 |
| C | 16.085899 | 6.068990  | 3.300000 |
| C | 20.285879 | 13.343590 | 3.300000 |
| C | 7.701030  | 3.621620  | 3.300000 |
| C | 11.901100 | 10.896260 | 3.300000 |
| C | 16.101101 | 3.621650  | 3.300000 |
| C | 20.301050 | 10.896240 | 3.300000 |
| C | 9.114010  | 6.068970  | 3.300000 |
| C | 13.314110 | 13.343640 | 3.300000 |
| C | 17.514040 | 6.069070  | 3.300000 |
| C | 21.714081 | 13.343720 | 3.300000 |
| C | 6.987030  | -0.008880 | 3.300000 |
| C | 11.186960 | 7.265800  | 3.300000 |
| C | 15.387120 | -0.008830 | 3.300010 |
| C | 19.587021 | 7.265820  | 3.300000 |
| C | 7.700950  | 1.228010  | 3.300000 |
| C | 11.901060 | 8.502650  | 3.300000 |
| C | 16.101160 | 1.228020  | 3.300000 |
| C | 20.301041 | 8.502630  | 3.300000 |

|   |           |           |          |
|---|-----------|-----------|----------|
| C | 9.098780  | 3.621610  | 3.300000 |
| C | 13.298900 | 10.896230 | 3.300000 |
| C | 17.498989 | 3.621620  | 3.300000 |
| C | 21.698879 | 10.896210 | 3.299990 |
| C | 9.812930  | 4.858420  | 3.300000 |
| C | 14.013030 | 12.133000 | 3.300000 |
| C | 18.213020 | 4.858480  | 3.300000 |
| C | 22.413090 | 12.133020 | 3.300000 |
| C | 3.485860  | 6.055320  | 3.300000 |
| C | 7.685950  | 13.329990 | 3.300000 |
| C | 11.885880 | 6.055230  | 3.300000 |
| C | 16.085930 | 13.329890 | 3.300000 |
| C | 1.413050  | -0.008760 | 3.300000 |
| C | 5.612990  | 7.265800  | 3.300000 |
| C | 9.813000  | -0.008810 | 3.300000 |
| C | 14.013030 | 7.265840  | 3.300000 |
| C | 4.914000  | 6.055120  | 3.300000 |
| C | 9.114120  | 13.329920 | 3.300000 |
| C | 13.314070 | 6.055210  | 3.300000 |
| C | 17.514059 | 13.329810 | 3.300000 |
| C | 6.986980  | 4.858420  | 3.300000 |
| C | 11.187040 | 12.133090 | 3.300000 |
| C | 15.387040 | 4.858480  | 3.300000 |
| C | 19.587000 | 12.133050 | 3.300000 |
| C | 0.698950  | 1.228040  | 3.300000 |

|   |           |           |          |
|---|-----------|-----------|----------|
| C | 4.898880  | 8.502630  | 3.300000 |
| C | 9.098880  | 1.228020  | 3.300000 |
| C | 13.298930 | 8.502650  | 3.300000 |
| C | 11.184560 | 4.876130  | 3.300000 |
| C | 15.384680 | 12.150740 | 3.300000 |
| C | 19.584629 | 4.876210  | 3.299990 |
| C | 23.784740 | 12.150850 | 3.299990 |
| C | 5.615270  | -0.026600 | 3.300000 |
| C | 9.815160  | 7.247990  | 3.300000 |
| C | 14.015340 | -0.026520 | 3.300010 |
| C | 18.215219 | 7.248100  | 3.300000 |
| C | 7.030490  | 2.424830  | 3.300000 |
| C | 11.230590 | 9.699440  | 3.300000 |
| C | 15.430650 | 2.424780  | 3.300000 |
| C | 19.630510 | 9.699410  | 3.300000 |
| C | 2.784680  | -0.026470 | 3.300000 |
| C | 6.984640  | 7.247980  | 3.300000 |
| C | 11.184640 | -0.026550 | 3.300000 |
| C | 15.384690 | 7.248120  | 3.300000 |
| C | 5.615230  | 4.876110  | 3.300000 |
| C | 9.815270  | 12.150900 | 3.300000 |
| C | 14.015270 | 4.876210  | 3.300000 |
| C | 18.215219 | 12.150760 | 3.300000 |
| C | 9.769300  | 2.424840  | 3.300000 |
| C | 13.969430 | 9.699430  | 3.300000 |

|   |           |           |           |
|---|-----------|-----------|-----------|
| C | 18.169460 | 2.424790  | 3.299990  |
| C | 22.369360 | 9.699410  | 3.299990  |
| C | 7.685860  | 6.068940  | 0.000000  |
| C | 11.885980 | 13.343740 | 0.000010  |
| C | 16.085920 | 6.069060  | 0.000010  |
| C | 20.285910 | 13.343660 | 0.000020  |
| C | 7.701030  | 3.621600  | -0.000010 |
| C | 11.901100 | 10.896240 | 0.000000  |
| C | 16.101101 | 3.621630  | 0.000000  |
| C | 20.301050 | 10.896220 | 0.000000  |
| C | 9.114030  | 6.068880  | 0.000000  |
| C | 13.314120 | 13.343550 | 0.000020  |
| C | 17.514050 | 6.068980  | 0.000000  |
| C | 21.714100 | 13.343640 | 0.000030  |
| C | 6.986960  | -0.008830 | 0.000020  |
| C | 11.186890 | 7.265840  | 0.000000  |
| C | 15.387050 | -0.008780 | 0.000040  |
| C | 19.586950 | 7.265860  | 0.000010  |
| C | 7.700990  | 1.228020  | 0.000000  |
| C | 11.901100 | 8.502650  | 0.000000  |
| C | 16.101200 | 1.228030  | 0.000020  |
| C | 20.301069 | 8.502640  | 0.000010  |
| C | 9.098820  | 3.621620  | 0.000000  |
| C | 13.298940 | 10.896240 | -0.000010 |
| C | 17.499020 | 3.621630  | -0.000050 |

|   |           |           |           |
|---|-----------|-----------|-----------|
| C | 21.698919 | 10.896220 | -0.000050 |
| C | 9.812860  | 4.858470  | 0.000000  |
| C | 14.012960 | 12.133050 | 0.000000  |
| C | 18.212950 | 4.858520  | -0.000040 |
| C | 22.413019 | 12.133070 | -0.000050 |
| C | 3.485870  | 6.055230  | -0.000030 |
| C | 7.685960  | 13.329900 | -0.000030 |
| C | 11.885900 | 6.055150  | 0.000000  |
| C | 16.085951 | 13.329800 | 0.000000  |
| C | 1.412990  | -0.008780 | -0.000010 |
| C | 5.612940  | 7.265770  | 0.000000  |
| C | 9.812940  | -0.008830 | -0.000010 |
| C | 14.012980 | 7.265820  | 0.000000  |
| C | 4.914020  | 6.055190  | 0.000000  |
| C | 9.114140  | 13.329990 | -0.000010 |
| C | 13.314100 | 6.055280  | 0.000000  |
| C | 17.514080 | 13.329880 | -0.000010 |
| C | 6.986930  | 4.858400  | 0.000000  |
| C | 11.186990 | 12.133070 | 0.000010  |
| C | 15.386980 | 4.858460  | 0.000010  |
| C | 19.586950 | 12.133030 | 0.000020  |
| C | 0.698950  | 1.228020  | -0.000030 |
| C | 4.898880  | 8.502600  | -0.000030 |
| C | 9.098880  | 1.227990  | 0.000000  |
| C | 13.298930 | 8.502630  | 0.000000  |

|   |           |           |           |
|---|-----------|-----------|-----------|
| C | 11.184630 | 4.876160  | 0.000000  |
| C | 15.384760 | 12.150770 | -0.000010 |
| C | 19.584709 | 4.876240  | -0.000060 |
| C | 23.784809 | 12.150880 | -0.000070 |
| C | 5.615350  | -0.026570 | 0.000040  |
| C | 9.815240  | 7.248020  | 0.000000  |
| C | 14.015420 | -0.026490 | 0.000070  |
| C | 18.215300 | 7.248130  | 0.000020  |
| C | 7.030520  | 2.424850  | -0.000010 |
| C | 11.230620 | 9.699460  | 0.000000  |
| C | 15.430670 | 2.424800  | 0.000010  |
| C | 19.630541 | 9.699430  | 0.000020  |
| C | 2.784750  | -0.026480 | 0.000010  |
| C | 6.984710  | 7.247960  | 0.000010  |
| C | 11.184710 | -0.026570 | -0.000010 |
| C | 15.384760 | 7.248110  | 0.000010  |
| C | 5.615300  | 4.876100  | 0.000010  |
| C | 9.815340  | 12.150880 | 0.000000  |
| C | 14.015340 | 4.876200  | 0.000010  |
| C | 18.215290 | 12.150750 | 0.000000  |
| C | 9.769330  | 2.424860  | 0.000000  |
| C | 13.969460 | 9.699450  | -0.000010 |
| C | 18.169479 | 2.424810  | -0.000060 |
| C | 22.369390 | 9.699430  | -0.000060 |
| H | 15.008020 | 9.699458  | -0.019192 |

|   |           |           |           |
|---|-----------|-----------|-----------|
| H | 15.904166 | 11.251211 | -0.003993 |
| H | 17.695791 | 11.251287 | -0.008640 |
| H | 18.591818 | 9.699404  | 0.004043  |
| H | 17.695791 | 8.147600  | -0.008405 |
| H | 15.904205 | 8.147633  | -0.003913 |
| H | 14.360282 | 2.424904  | 0.001293  |
| H | 13.480222 | 3.949252  | 0.001868  |
| H | 11.719739 | 3.949169  | -0.000109 |
| H | 10.839813 | 2.424971  | 0.001444  |
| H | 9.295902  | 8.147410  | -0.023355 |
| H | 10.193801 | 9.699417  | -0.069973 |
| H | 9.296036  | 11.251463 | -0.023139 |
| H | 7.503943  | 8.147390  | 0.024146  |
| H | 5.080368  | 3.949121  | 0.003308  |
| H | 5.960238  | 2.424974  | 0.001620  |
| H | 13.480362 | 0.900653  | 0.002759  |
| H | 11.719834 | 0.900601  | 0.000652  |
| H | 5.080392  | 0.900580  | 0.001549  |
| H | 23.406221 | 9.699437  | 0.069461  |
| H | 24.304045 | 11.251432 | 0.023423  |
| H | 20.119968 | 3.949266  | 0.000866  |
| H | 19.240051 | 2.424888  | 0.001078  |
| H | 3.319952  | 0.900671  | -0.000650 |
| H | 15.039849 | 9.699442  | 9.901167  |
| H | 15.919790 | 11.223706 | 9.901350  |

|   |           |           |          |
|---|-----------|-----------|----------|
| H | 17.680153 | 11.223715 | 9.901296 |
| H | 18.560099 | 9.699394  | 9.901690 |
| H | 17.680136 | 8.175150  | 9.901580 |
| H | 15.919827 | 8.175140  | 9.901342 |
| H | 14.393227 | 2.421453  | 9.890381 |
| H | 13.497146 | 3.978935  | 9.893141 |
| H | 11.700560 | 3.976119  | 9.891408 |
| H | 10.809258 | 2.421523  | 9.893456 |
| H | 9.280028  | 8.175064  | 9.899898 |
| H | 10.160113 | 9.699377  | 9.900213 |
| H | 9.280204  | 11.223796 | 9.900590 |
| H | 7.519808  | 8.175038  | 9.900450 |
| H | 5.094363  | 3.981937  | 9.891177 |
| H | 5.995728  | 2.420956  | 9.886067 |
| H | 13.492427 | 0.872469  | 9.897902 |
| H | 11.705341 | 0.875003  | 9.894488 |
| H | 5.090700  | 0.870027  | 9.897235 |
| H | 23.439842 | 9.699367  | 9.898725 |
| H | 24.319860 | 11.223771 | 9.898786 |
| H | 20.098999 | 3.973715  | 9.892665 |
| H | 19.211752 | 2.422086  | 9.892245 |
| H | 3.303652  | 0.877485  | 9.896215 |
| H | 15.008019 | 9.699457  | 6.580808 |
| H | 15.904164 | 11.251211 | 6.596007 |
| H | 17.695791 | 11.251287 | 6.591360 |



|   |           |           |          |
|---|-----------|-----------|----------|
| H | 18.591827 | 9.699405  | 6.604043 |
| H | 17.695793 | 8.147601  | 6.591594 |
| H | 15.904204 | 8.147633  | 6.596087 |
| H | 14.360292 | 2.424907  | 6.601294 |
| H | 13.480221 | 3.949252  | 6.601869 |
| H | 11.719739 | 3.949169  | 6.599892 |
| H | 10.839813 | 2.424971  | 6.601444 |
| H | 9.295902  | 8.147408  | 6.576644 |
| H | 10.193802 | 9.699408  | 6.530026 |
| H | 9.296040  | 11.251462 | 6.576858 |
| H | 7.503945  | 8.147389  | 6.624147 |
| H | 5.080363  | 3.949125  | 6.603308 |
| H | 5.960238  | 2.424976  | 6.601620 |
| H | 13.480361 | 0.900652  | 6.602761 |
| H | 11.719834 | 0.900600  | 6.600652 |
| H | 5.080394  | 0.900577  | 6.601550 |
| H | 23.406221 | 9.699433  | 6.669457 |
| H | 24.304050 | 11.251432 | 6.623426 |
| H | 20.119967 | 3.949264  | 6.600865 |
| H | 19.240059 | 2.424882  | 6.601077 |
| H | 3.319954  | 0.900668  | 6.599350 |
| H | 15.039849 | 9.699442  | 3.301255 |
| H | 15.919790 | 11.223705 | 3.301342 |
| H | 17.680153 | 11.223715 | 3.301425 |
| H | 18.560099 | 9.699394  | 3.301373 |

|   |           |           |          |
|---|-----------|-----------|----------|
| H | 17.680136 | 8.175148  | 3.301398 |
| H | 15.919827 | 8.175140  | 3.301256 |
| H | 14.393217 | 2.421454  | 3.291707 |
| H | 13.497147 | 3.978937  | 3.292723 |
| H | 11.700561 | 3.976118  | 3.291643 |
| H | 10.809258 | 2.421524  | 3.293221 |
| H | 9.280028  | 8.175064  | 3.300013 |
| H | 10.160112 | 9.699377  | 3.300226 |
| H | 9.280204  | 11.223795 | 3.300186 |
| H | 7.519808  | 8.175036  | 3.299766 |
| H | 5.094385  | 3.981951  | 3.288222 |
| H | 5.995704  | 2.420946  | 3.288459 |
| H | 13.492440 | 0.872461  | 3.293910 |
| H | 11.705345 | 0.875008  | 3.296102 |
| H | 5.090696  | 0.870020  | 3.295138 |
| H | 23.439842 | 9.699368  | 3.300112 |
| H | 24.319860 | 11.223771 | 3.300013 |
| H | 20.099012 | 3.973714  | 3.295269 |
| H | 19.211761 | 2.422086  | 3.294863 |
| H | 3.303652  | 0.877480  | 3.295360 |
| C | 16.799982 | 9.699406  | 6.671480 |
| O | 16.799789 | 9.699494  | 7.845218 |
| O | 16.800217 | 9.699481  | 5.494851 |
| C | 16.799982 | 9.699405  | 0.071479 |
| O | 16.799789 | 9.699494  | 1.245218 |

|   |           |          |           |
|---|-----------|----------|-----------|
| O | 16.800215 | 9.699481 | -1.105150 |
| C | 8.399996  | 9.699311 | 6.600009  |
| O | 8.435630  | 9.699464 | 7.774882  |
| O | 8.364381  | 9.699514 | 5.425118  |
| C | 8.399999  | 9.699309 | 0.000010  |
| O | 8.435629  | 9.699465 | 1.174882  |
| O | 8.364379  | 9.699515 | -1.174883 |
| C | 12.610610 | 2.443860 | 9.971267  |
| O | 12.616999 | 2.454438 | 11.144994 |
| O | 12.616683 | 2.453745 | 8.794632  |
| C | 12.610607 | 2.443859 | 3.371273  |
| O | 12.617016 | 2.454414 | 4.544990  |
| O | 12.616665 | 2.453769 | 2.194628  |
| C | 4.233090  | 2.444057 | 9.970882  |
| O | 4.250941  | 2.454313 | 11.144579 |
| O | 4.249745  | 2.453500 | 8.794217  |
| C | 4.233086  | 2.444064 | 3.370876  |
| O | 4.250987  | 2.454287 | 4.544582  |
| O | 4.249690  | 2.453526 | 2.194217  |

## Supplementary References

- [1] G. Lippert, J. Hutter, M. Parrinello, *Mol. Phys.*, 1997, **92**, 477-488.

- [2] J. VandeVondele, M. Krack, F. Mohamed, M. Parrinello, T. Chassaing, J. Hutter, *Comput. Phys. Commun.*, 2005, **167**, 103.
- [3] J. VandeVondele, J. Hutter, *J. Chem. Phys.*, 2007, **127**, 114105.
- [4] a) S. Goedecker, M. Teter, J. Hutter, *Phys. Rev. B*, 1996, **54**, 1703; b) M. Krack, *Theor. Chem. Acc.*, 2005, **114**, 145-152.
- [5] S. Grimme, *J. Comput. Chem.*, 2006, **27**, 1787-1799.
- [6] a) S. Kirkpatrick, C. D. Gelatt, M. P. Vecchi, *Science*, 1983, **220**, 671; b) R. Car, R. Parrinello, *Phys. Rev. Lett.*, 1985, **55**, 2471.
- [7] a) T. D. Kühne, M. Krack, F. R. Mohamed, M. Parrinello, *Phys. Rev. Lett.*, 2007, **98**, 066401; b) T. D. Kühne, *WIREs Comput. Mol. Sci.*, 2014, **4**, 391.
